# Supplementary material
Source: publisher figshare collection journal article supplement (https://sage.figshare.com/ndownloader/files/14375579)
Supplement: Supplementary file 1 [file 14375579]

## **Description of the Training Sessions for Dialogic Reading**

Each 45-minute session included the following elements:

- (1) Description of shared interactive reading and benefits to children's language/literacy skills,
- (2) Definition of dialogic reading
- (3) Definition and examples of each CROWD strategy
- (4) Definition and examples of each PEER element
- (5) Definition of wait time
- (6) Viewing video example of DR (Video 6.8 from CONNECT Module; Buysse, Winton, Rous, Epstein, & Cavanaugh, 2011)
- (7) Example of how books would be scripted with 10 questions based on CROWD, using *Pigs A Plenty, Pigs Galore* (McPhail, 2008)
- (8) Guided practice by each participant using a pre-scripted book
- (9) Instructions on how to script a book during the generalization phase (CONNECT Video 6.5; CONNECT Handout 6.3; Buysse et al., 2011)
- (10) Addressing questions and concerns

## **References**

- Buysse, V., Winton, P., Rous, B., Epstein, D., & Cavanaugh, C. (2011). CONNECT Module 6: Dialogic Reading Practices [Web-based professional development curriculum]. Chapel Hill: University of North Carolina, FPG Child Development Institute, CONNECT: The Center to Mobilize Early Childhood Knowledge.
- McPhail, D. (2008). *Pigs aplenty, pigs galore!* New York, NY: Penguin Group.
